# Supplementary material for: Exploring Macro-to-Microcirculatory Coupling Through the Vasopressor Test in Septic Shock Patients
Source: Research Square preprint supplement (doi:10.21203/rs.3.rs-6736558/v1), 2025-06-04
Supplement: Supplementary file 1 [file cb6121e296c2ab336be87d36.docx]

**Supplemental Material**

**Exploring Macro-to-Microcirculatory Coupling Through the Vasopressor Test in Septic Shock Patients**

**Supplementary Figure 1**


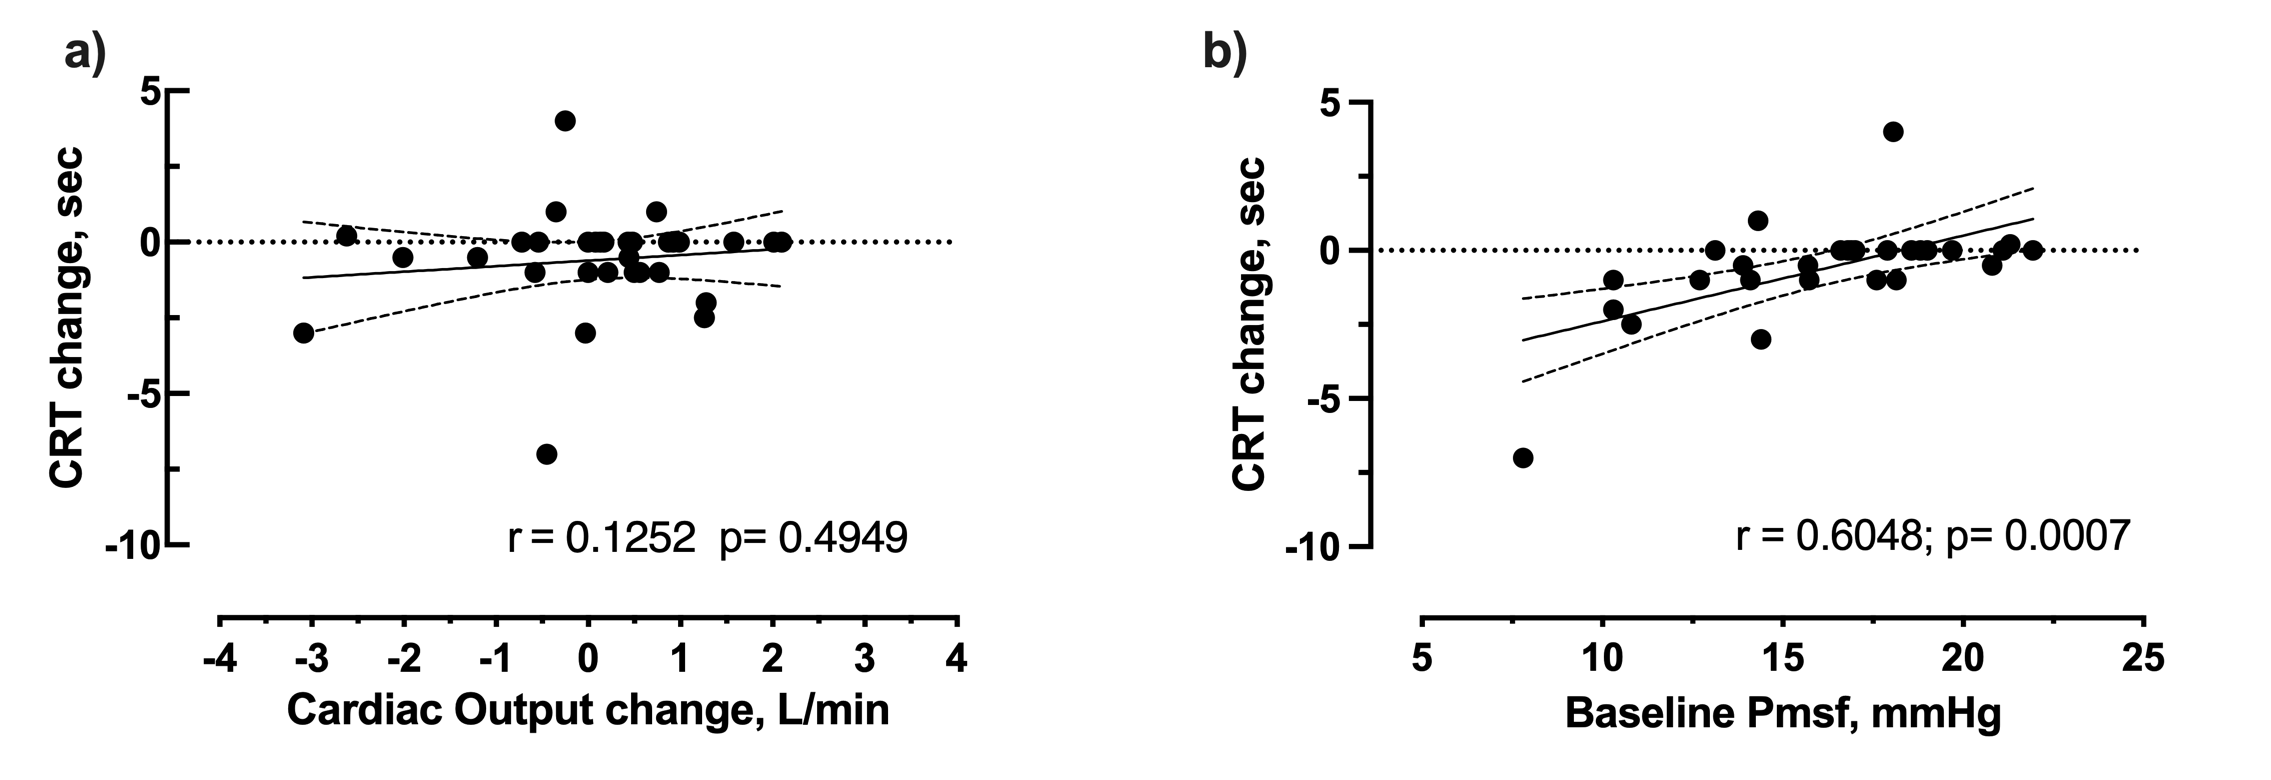


Legend: a) Correlation between capillary refill time change and cardiac output changes during vasopressor test; b) correlation between capillary refill time change and baseline mean systemic filling pressure (Pmsf) after the vasopressor test.

**Supplementary Figure 2**


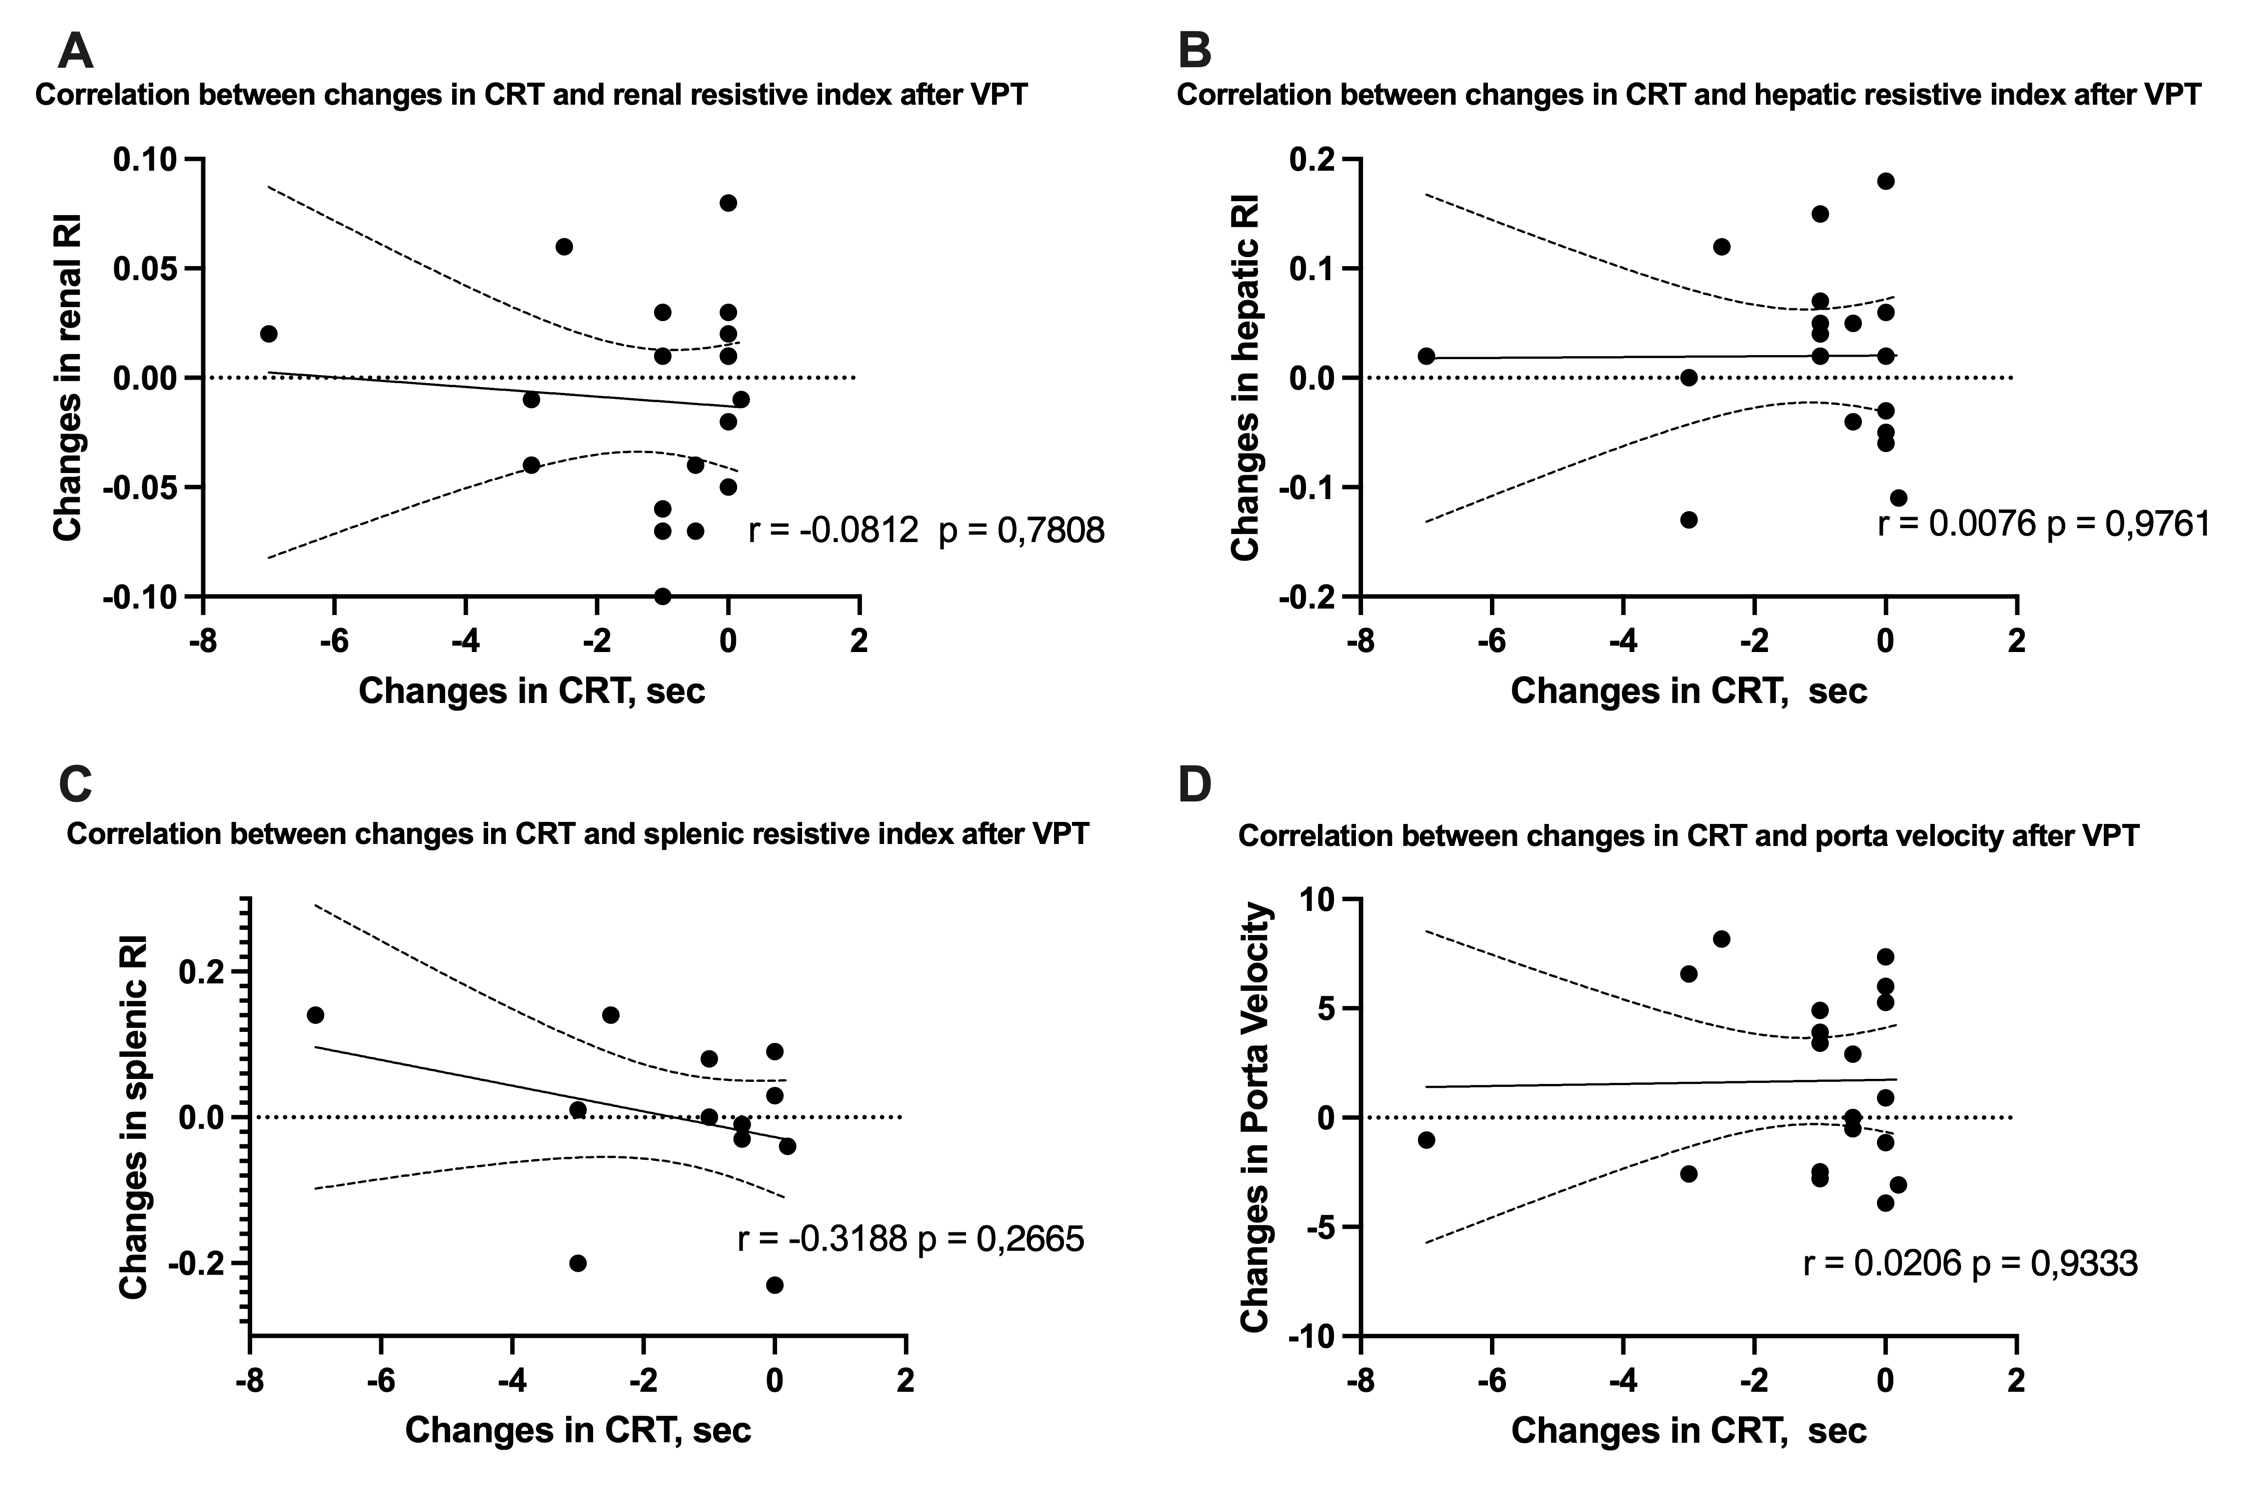


Legend: A) Correlation between capillary refill time change and renal resistive index during vasopressor test; B) correlation between capillary refill time change and renal resistive index change during vasopressor test; C) correlation between capillary refill time change and splenic resistive change index during vasopressor test; and D) correlation between capillary refill time change and porta vein velocity change during vasopressor test.

| **Supplementary Table 1. Univariate and multivariate logistic analysis of predictors of capillary refill time improvement during vasopressor test.** | | | | |
| --- | --- | --- | --- | --- |
|  | **β (S.E)** | **Odds ratio [95% CI]** | **Wald** | **p value** |
| NE, mcg/kg/min | -6.671 (3.818) | 0.001 [0.000-2.254] | 3.053 | 0.081 |
| HR, beats/min | -0.048 (0.029) | 0.953 [0.901-1.008] | 2.857 | 0.091 |
| CVC, mmHg | -0.310 (0.142) | 0.734 [0.556-0.968] | 4.786 | 0.025 |
| Pmsf, mmHg | -0.539 (0.201) | 0.583 [0.393-0.865] | 7.185 | 0.007 |
| venous return driving pressure, mmHg | -1.069 (0.411) | 0.343 [0.154-0.768] | 6.767 | 0.009 |
| Venous return resistance index, mmHg/ml | 4.452 (1.976) | 85.820 [1.784-4128.810] | 5.075 | 0.024 |
| Systemic vascular resistance index, mmHg/ml | 0.007 (0.003) | 1.007 [1.002-1.013] | 7.016 | 0.008 |
| Aortic elastance, mmHg/ml | 1.715 (0.939) | 5.555 [0.882-35.002] | 3.333 | 0.068 |
| Tissue perfusion pressure, mmHg | 0.175 (0.088) | 1.192 [1.002-1.417] | 3.942 | 0.047 |
| Capillary refill time, sec | 1.089 (0.401) | 2.972 [1.355-6.519] | 7.385 | 0.007 |
| Cardiac output, L/min | -0.001 (0.000) | 0.999 [0.998-1.000] | 7.006 | 0.008 |
| Stroke volume, ml | -0.069 (0.031) | 0.934 [0.879-0.992] | 4.997 | 0.025 |
| Left ventricular ejection fraction, % | -0.079 (0.038) | 0.924 [0.858-0.996] | 4.265 | 0.039 |
| **Multivariate logistic regression analysis for tissue perfusion improvement:** AUC 0.92 (95%CI 0.82-1.00) | | | | |
| Pmsf, mmHg | -0.469 (0.223) | 0.626 [0.404-0.968] | 4.430 | 0.035 |
| Stroke volume, ml | -0.085 (0.046) | 0.919 [0.840-1.005] | 3.432 | 0.064 |
| Legend. NE = norepinephrine; HR = heart rate; CVC = central venous pressure; Pmsf = mean systemic filling pressure; TDI = tissue Doppler imaging. | | | | |

**Supplementary Table 2**. STROBE Statement—Checklist

**This manuscript was written in accordance with the "Strengthening the Reporting of Observational Studies in Epidemiology" (STROBE) guidelines.**

Each STROBE Statement—Checklist item has been meticulously addressed in the main manuscript.

|  | **No** | **Recommendation** |
| --- | --- | --- |
| **Title and abstract** | 1 | (*a*) Indicate the study’s design with a commonly used term in the title or the abstract |
|  |  | (*b*) Provide in the abstract an informative and balanced summary of what was done  and what was found |
| **Introduction** |  |  |
| Background/rationale | 2 | Explain the scientific background and rationale for the investigation being reported |
| Objectives | 3 | State specific objectives, including any prespecified hypotheses |
| **Methods** |  |  |
| Study design | 4 | Present key elements of study design early in the paper |
| Setting | 5 | Describe the setting, locations, and relevant dates, including periods of recruitment,  exposure, follow-up, and data collection |
| Participants | 6 | (*a*) Give the eligibility criteria, and the sources and methods of selection of  participants |
| Variables | 7 | Clearly define all outcomes, exposures, predictors, potential confounders, and effect  modifiers. Give diagnostic criteria, if applicable |
| Data sources/ measurement | 8* | For each variable of interest, give sources of data and details of methods of assessment (measurement). Describe comparability of assessment methods if there is  more than one group |
| Bias | 9 | Describe any efforts to address potential sources of bias |
| Study size | 10 | Explain how the study size was arrived at |
| Quantitative variables | 11 | Explain how quantitative variables were handled in the analyses. If applicable,  describe which groupings were chosen and why |
| Statistical methods | 12 | (*a*) Describe all statistical methods, including those used to control for confounding |
|  |  | (*b*) Describe any methods used to examine subgroups and interactions |
|  |  | (*c*) Explain how missing data were addressed |
|  |  | (*d*) If applicable, describe analytical methods taking account of sampling strategy |
|  |  | (*e*) Describe any sensitivity analyses |
| **Results** |  |  |
| Participants | 13* | (a) Report numbers of individuals at each stage of study—eg numbers potentially eligible, examined for eligibility, confirmed eligible, included in the study,  completing follow-up, and analysed |
|  |  | (b) Give reasons for non-participation at each stage |
|  |  | (c) Consider use of a flow diagram |
| Descriptive data | 14* | (a) Give characteristics of study participants (eg demographic, clinical, social) and  information on exposures and potential confounders |
|  |  | (b) Indicate number of participants with missing data for each variable of interest |
| Outcome data | 15* | Report numbers of outcome events or summary measures |
| Main results | 16 | (*a*) Give unadjusted estimates and, if applicable, confounder-adjusted estimates and their precision (eg, 95% confidence interval). Make clear which confounders were  adjusted for and why they were included |
|  |  | (*b*) Report category boundaries when continuous variables were categorized |
|  |  | (*c*) If relevant, consider translating estimates of relative risk into absolute risk for a  meaningful time period |
| Other analyses | 17 | Report other analyses done—eg analyses of subgroups and interactions, and  sensitivity analyses |

**Figure legends**

**Figure 1.** Individual changes in capillary refill time (CRT) at baseline and after the vasopressor test (VPT) in patients stratified by stroke volume (SV) changes. Each dashed line represents an individual patient's CRT trajectory. Responders were defined as those exhibiting a >10% increase in SV during VPT, whereas non-responders showed no significant SV change. The red horizontal bars indicate the median CRT values at each time point. The figure highlights divergent patterns of the peripheral perfusion response depending on stroke volume responsiveness.

**Figure 2.** Relationship between changes in stroke volume (ΔSV) and capillary refill time (ΔCRT) across patients following the vasopressor test. Each point represented an individual patient. Slope types were classified as negative, positive, or neutral, based on the direction of the CRT response to SV changes. The blue and red trend lines indicate the linear regression fits for patients with negative and positive slopes, respectively. The dotted grey lines represent the reference zero axes for ΔSV and ΔCRT, respectively.
